# Supplementary material for: A Viral Suppressor Modulates the Plant Immune Response Early in Infection by Regulating MicroRNA Activity
Source: PubMed Central journal article supplement (PMC5915741; doi:10.1128/mbio.00419-18), 2018-04-24
Supplement: mbo002183848sf1.pdf [file mbo002183848sf1.pdf]

Fig. S1

>nbe-miR403a precursor  
AAAGAGTCATATTTTCA**CGTTTGTGCGTGA****TCTGACA**ACCCTTTTATCATTTTTATCTCATGGGTTGTGTTT**TTAGATTACGCACAAACTCG**  
CAATATGCTTTTTCT  
Location: >Niben101Scf00793Ctg034:3501-4700

>nbe-miR403b precursor  
TCTGAAAGAGGCATATTTTCA**CGTTTGTGCGTGA****TCTGACA**ACCATTTTTATCATTAAATTTATTTTTATCTCATTGGTTGTGTTT**TTAGATTC**  
**ACGCACAAACTCG**TAATATGACTTTTCTCATCT  
Location: >Niben101Scf06412Ctg035:201-1400

>nbe-MIR162a precursor  
TGGTTGGTTAAGAACACT**GGAGGCAGCGGT****ATCGATC**TGTTCCCTGAAAAGCGATAAACAAAATATAGCAACAGGAATCG**TCGATAAACC**  
**TCTGCATCCAG**CGGTTAACCCCTTCT  
Location: >Niben101Scf11303Ctg014:3301-4500

>nbe-MIR162b precursor  
TTCTTTTGGTTGGTTAAAAACACT**GGAGGCAGCGGT****ATCGATC**TGTTCCCTGAAAAGCGATAAACAAAATATAGCAACAGGAATCG**TCGA**  
**TAAACCTCTGCATCCAG**CGCTTAACCCCTTCTCTCT  
Location: >Niben101Scf01764Ctg011:2801-4000 (-1)

>nbe-MIR168a precursor  
TGCTCTAAT**TCGCTTGGTGCAGGTCGGGA****TAATTCGCCGGCGACGGCGCAATCACGACGACGGT**GATTGTTATTTAATGGAGTTTAGAC  
GTACGAAGTTATCAACATTTTTTGGTTTTGCAGCGAAATTTG**CCCGCCTTGCATCAACTGAAT**TGGAGACTGC  
Location: >Niben101Scf10054Ctg018:1201-2400

>nbe-MIR168b precursor  
CTCTAAT**TCGCTTGGTGCAGGTCGGGA****TAATTCGCCGGCGACGGCGCAATCACGACGCGGT**GATTGTTATTTAATGGAGTTAAGATGTACGA  
AGTTATCAACTTTTTTGGTTTTGCAGCGAAATTTG**CCCGCCTTGCATCAACTGAAT**TAGAGACTGC  
Location: >Niben101Scf10307Ctg006:2101-3300

>nbe-MIR168c-1 precursor  
GTCTCTCAT**TCGCTTGGTGCAGGTCGGGA****CTGCTTGTCCGGCACAATGACGTCAGCTGACGGTGACGGTGGC**CATATCGATAGATATACAT  
GTTTATGACGAAGTTGGGT**CCCGCCTTGCATCAACTGAAT**CGGAGACTGCGGCGAAT  
Location: >Niben101Scf04636Ctg025:701-1900

>nbe-MIR168c-2 precursor  
GGTCTCTCAT**TCGCTTGGTGCAGGTCGGGA****CTGCTCGCCGGCGACAATGACGTCAGCTGACGGTTACGGTGCCG**TATCGATAGATATACA  
TGTTGTTTATGACGAAGTTGGGT**CCCGCCTTGCATCAACTGAAT**CGGAGACTGCGGT  
Location: >Niben101Scf07765Ctg021:44501-45800 (-1)

>nbe-MIR168d precursor  
GGTCTCTAAT**TCGCTTGGTGCAGGTCGGGA****CTGACTCGCCGGTGACGCTGTCCGCGCCGAATCGGCGCCCT**AGTTTCATTGATATTTT  
TTTACATGTACCGATGTTTAGAGAGCTCTCTTTGGACTTATTTGTTAGTAATTTTTGTTGTTGAAAATAACTTGATATATGTATAGCTAAGTAGA  
GAGTGTTTACCACGGTTAGTTAAGTAATAGATACTATGTAGAGAGTGTACCACGGTTGGTTAGGTAATGGATATGTAGAGAGTTTCATGTTT  
TTAATAGATTAGTTATGAATGAAAGTGCCTCGTAAATGGCTAAGTTTGT**CCCGCCTTGCATCAACTGAAT**TGGTGACCGC  
Location: >Niben101Scf08513Ctg014:21401-22800 (-1)

>nbe-MIR168e precursor  
CTCTAAC**TCGCTTGGTGCAGGTCGGGA****CTGACTCGCCGGTGACGCTGTCCGCGCCGAATCGGCGCCCT**AGTCTCAATCATTTTTGTT  
ATATGCATCGATATTCAGAGAGCTCTCATTAGGACTTATTTGTTAGTAATTTTTGTTGTTGAAATTAACTTGATATATGTATAGATAAGTAGAGA  
GTGTTTACCACGGTTGGTTAAGTAATAGATATGTAGAGACTGTTTCCACGGTTGGTTCCACGGTTGGTTAAGTAATGGATATGTAGAGAG  
TTCAATTTTTTTAATAGATTAGTTATGAATGAAATGCGCCTCGTCAATGGCTAAGTTTGT**CCCGCCTTGCATCAACTGAAT**CGGTGACCGC  
Location: >Niben101Scf07340Ctg008:19901-21400

**Fig. S1. *Nicotiana benthamiana* miRNA precursor 5'-to-3' sequences; their location in the *Nb* genome v.0.4.2 at <https://solgenomics.net/>. Mature and passenger sequences are highlighted in red (mature) and in blue (passenger strands); nucleotides that differ between miRNA isoforms are labeled in green. The search was supported by unpublished sRNA data and facilitated by the fact that miRNA guide strands are highly conserved among dicots (44).**
