# Supplementary material for: A Viral Suppressor Modulates the Plant Immune Response Early in Infection by Regulating MicroRNA Activity
Source: PubMed Central journal article supplement (PMC5915741; doi:10.1128/mbio.00419-18), 2018-04-24
Supplement: mbo002183848sf2.pdf [file mbo002183848sf2.pdf]

**Fig. S2**

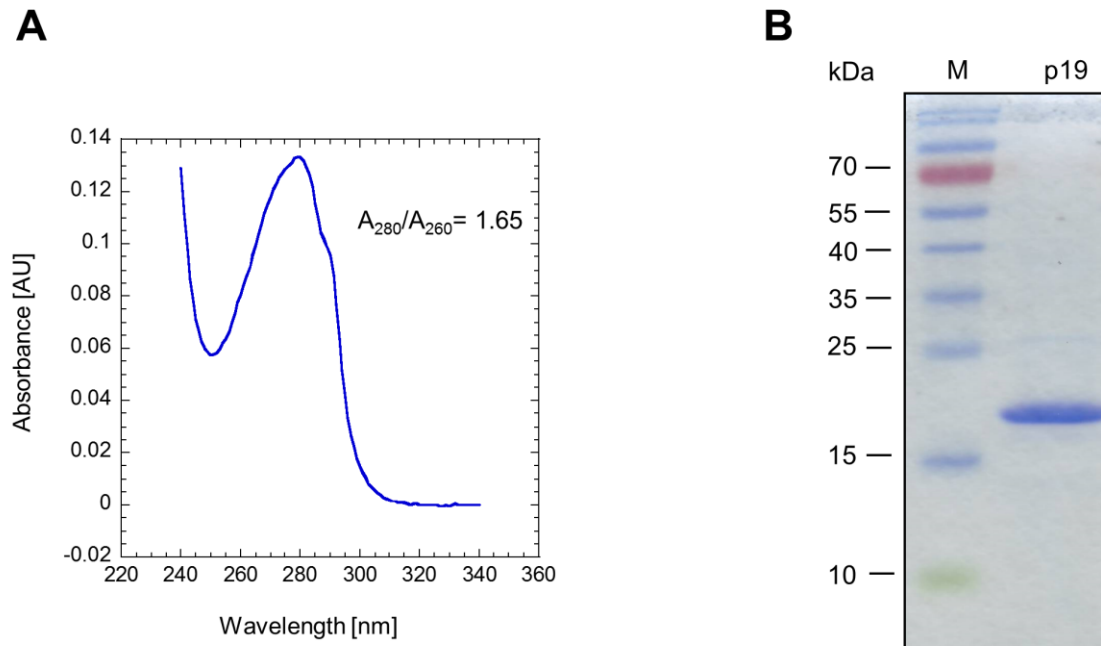

**Fig. S2. Purification of *CIRV* p19.** (A) Representative absorption spectrum of purified *CIRV* p19. (B) Purified *CIRV* p19 (0.5  $\mu$ g) separated on SDS PAGE and stained with coomassie blue.
