# Supplementary material for: A Viral Suppressor Modulates the Plant Immune Response Early in Infection by Regulating MicroRNA Activity
Source: PubMed Central journal article supplement (PMC5915741; doi:10.1128/mbio.00419-18), 2018-04-24
Supplement: mbo002183848sf3.pdf [file mbo002183848sf3.pdf]

**Fig. S3**

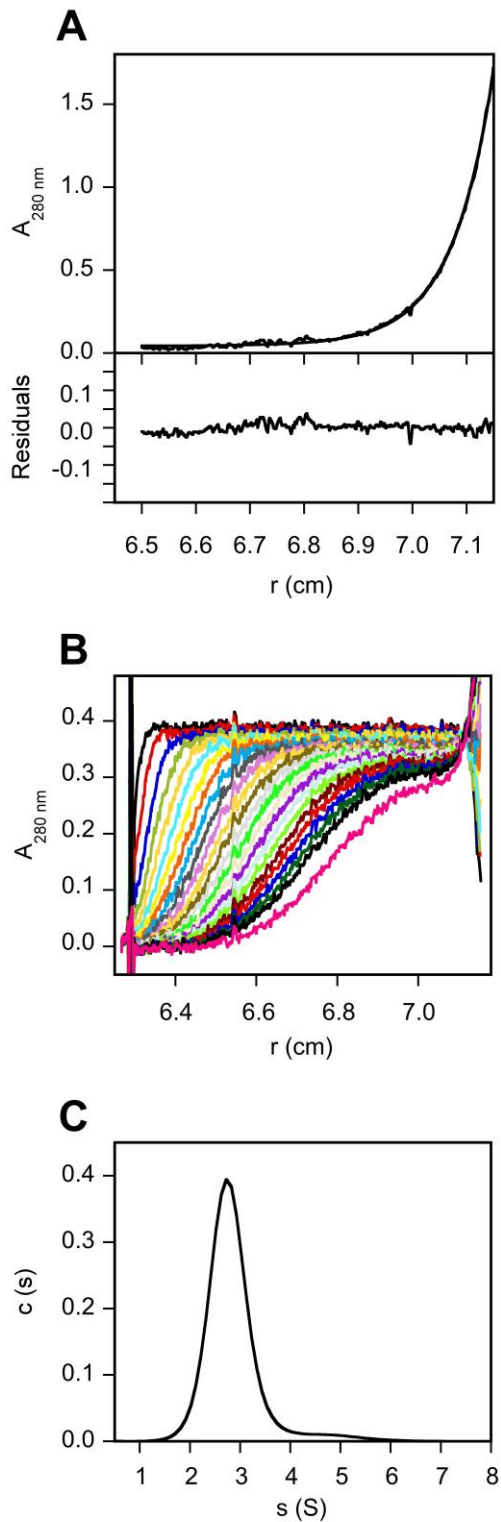

**Fig. S3. Analytical ultracentrifugation of CIRV p19.** (A) Equilibrium run at 18000 rpm, 20°C, (B) sedimentation velocity at 40000 rpm, 20°C, (C) Calculation of the sedimentation coefficient. Analysis of data was performed as described in the Materials and Methods

section. The calculated sedimentation coefficient was  $s(\text{app}) = 2.74 \text{ S}$ . From the equilibrium, the corresponding molecular mass was determined to be  $46 \pm 4 \text{ kDa}$  independently of protein concentration (theoretical mass of *CIRV* p19 monomer  $19.479 \text{ kDa}$ ). These data confirmed the purified p19 to form a protein dimer (22, 23).
