# Supplementary material for: A Viral Suppressor Modulates the Plant Immune Response Early in Infection by Regulating MicroRNA Activity
Source: PubMed Central journal article supplement (PMC5915741; doi:10.1128/mbio.00419-18), 2018-04-24
Supplement: mbo002183848sf4.pdf [file mbo002183848sf4.pdf]

**Fig. S4**

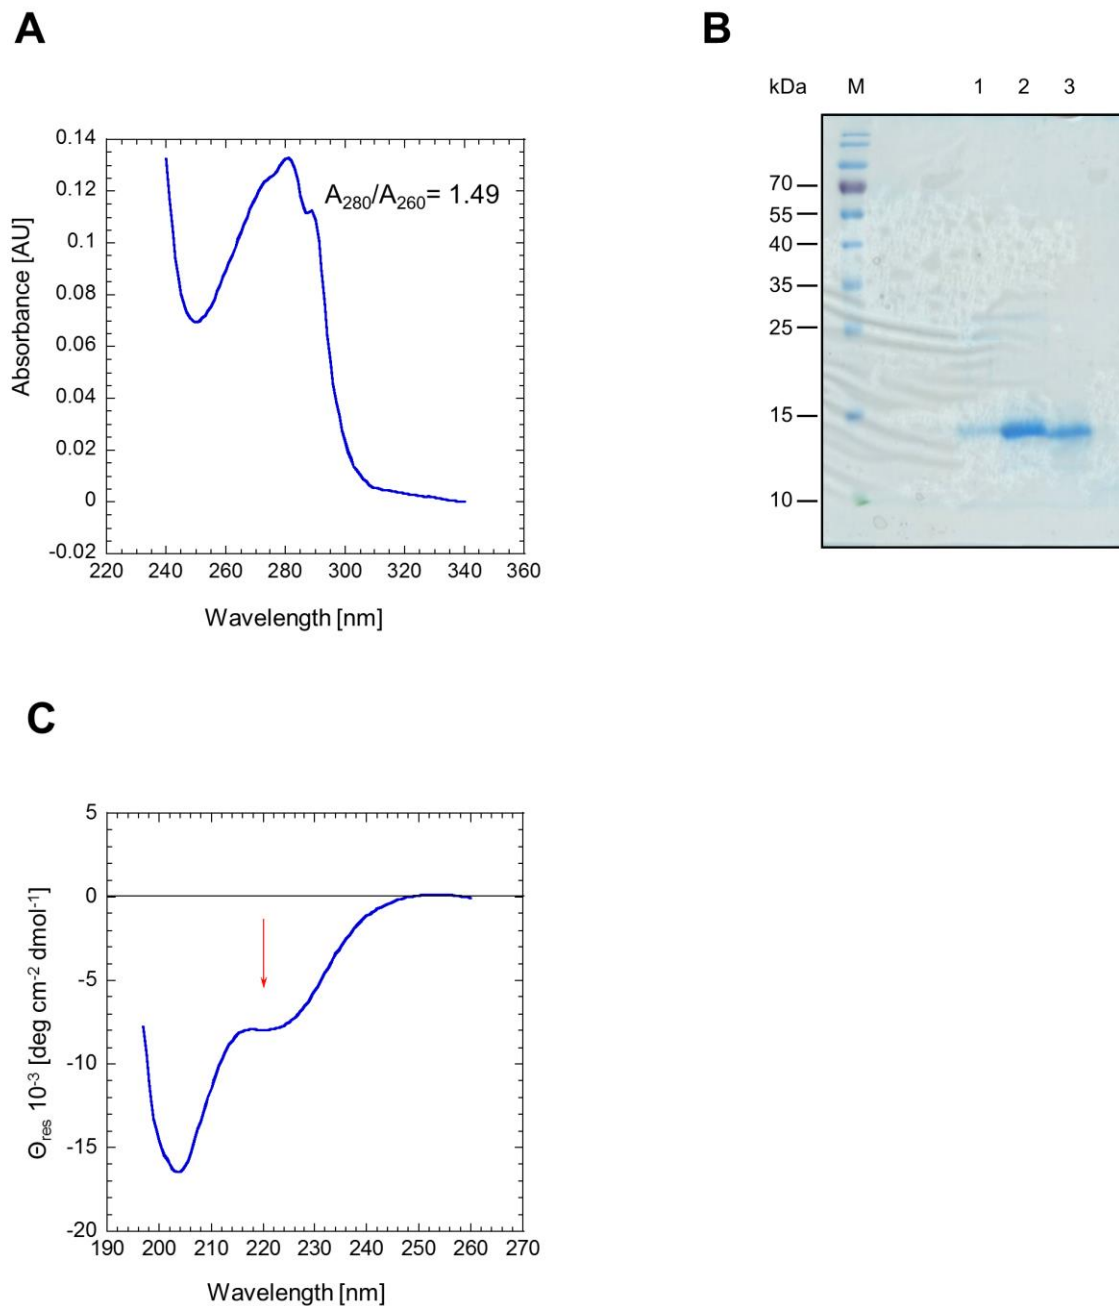

**Fig. S4. Purification of TAV 2b.** (A) Representative absorption spectrum of purified TAV 2b. (B) Purified TAV 2b gel filtration fractions of ca. 0.1, 0.5 and 0.2  $\mu\text{g}$  of protein were separated on SDS PAGE and stained with coomassie blue. The protein bands run at an apparent size of about 12-13 kDa; mass spectrometry (MALDI TOF) revealed a molecular weight of 11.164 kDa (not shown). (C) Far-UV circular dichroism spectrum (CD)

measurements of the same preparation as in (A) indicate a random coil structure and a small helical content (indicated by the arrow) of the RNA-free protein.
