# Supplementary material for: A Viral Suppressor Modulates the Plant Immune Response Early in Infection by Regulating MicroRNA Activity
Source: PubMed Central journal article supplement (PMC5915741; doi:10.1128/mbio.00419-18), 2018-04-24
Supplement: mbo002183848sf5.pdf [file mbo002183848sf5.pdf]

**Fig. S5**

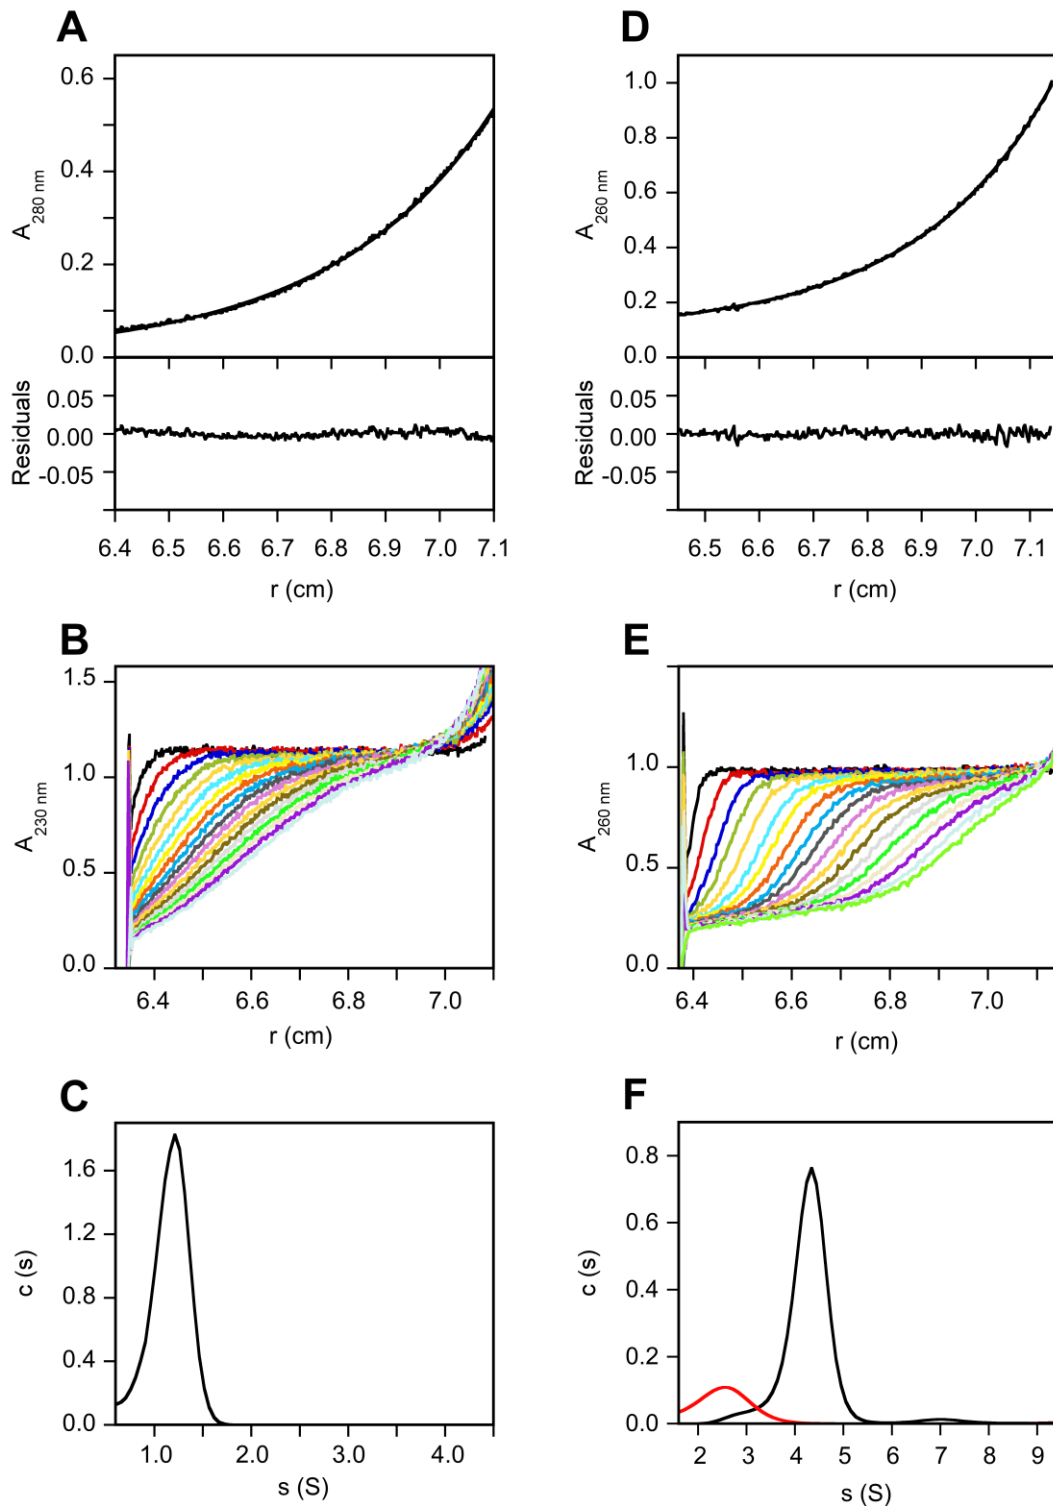

**Fig. S5. Analytical ultracentrifugation of TAV 2b in the absence and the presence of miR162.** (A to C) Analyses in the absence of RNA; (D to F) analyses in the presence of miR162. Isolated protein was used at 2  $\mu\text{M}$ , in complex with miR162 the concentrations were

4  $\mu\text{M}$  TAV 2b and 2  $\mu\text{M}$  miR162. Data monitoring occurred at 230, 260 or 280 nm. (A) Sedimentation equilibrium of TAV 2b (20,000 rpm) yielded an apparent molecular mass of  $M_r(\text{app}) = 10.5$  kDa. (B) For sedimentation velocity the sample was measured every 10 min at 40,000 rpm. (C) Data analyses using the program Sedfit resulted in a sedimentation coefficient of  $s(\text{app}) = 1.21$  S. (D) Molecular mass determination of the complex was done at 8,000 rpm and yielded a  $M_r(\text{app}) = 51.1$  kDa. (E) Sedimentation velocity at 40,000 rpm showed an almost homogenous protein/RNA complex with a sedimentation coefficient of  $s(\text{app}) = 4.34$  S (F, black line) together with a small excess of free microRNA ( $s(\text{app}) = 2.55$  S (red line in (F))).
