# Supplementary material for: A Viral Suppressor Modulates the Plant Immune Response Early in Infection by Regulating MicroRNA Activity
Source: PubMed Central journal article supplement (PMC5915741; doi:10.1128/mbio.00419-18), 2018-04-24
Supplement: mbo002183848sf8.pdf [file mbo002183848sf8.pdf]

**Fig. S8**

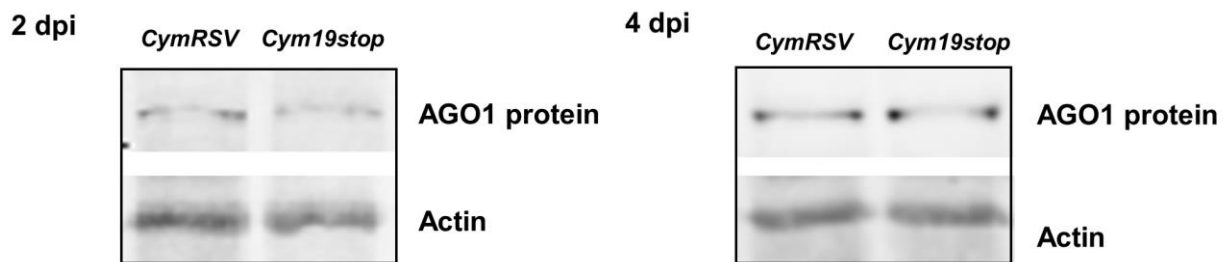

**Fig. S8. Western blot analysis of total protein extracts for AGO1 accumulation.**

*Cym19stop* and *CymRSV* inoculated leaves of *Nicotiana benthamiana* were homogenized at 2 and 4 dpi and used for protein extraction. *NbAGO1* protein was detected using a rabbit antibody raised against two N-terminal peptide sequences of the protein. Actin was detected as a loading control. Note that the *NbAGO1* levels do not differ between *CymRSV*- and *Cym19stop*-infected plants.
