# Supplementary material for: A Viral Suppressor Modulates the Plant Immune Response Early in Infection by Regulating MicroRNA Activity
Source: PubMed Central journal article supplement (PMC5915741; doi:10.1128/mbio.00419-18), 2018-04-24
Supplement: mbo002183848st1.pdf [file mbo002183848st1.pdf]

**Table S1: DNA oligonucleotides used in this study**

| primer name                 | sequence                                               | purpose                                    |
|-----------------------------|--------------------------------------------------------|--------------------------------------------|
| p19pGEXf                    | GCGGATCCATGGAACGAGCTA<br>TACAAGGAAAC                   | PCR primer for p19 cloning<br>(forward)    |
| p19pGEXr                    | TCCCCCGGGGAATTACTCGCT<br>TTCTTTCTTGAAGGTTTC            | PCR primer for p19 cloning<br>(reverse)    |
| pSUMOTAV2b1f                | GACCATGAAGACCGTGGTATG<br>GCAAGCATCGAGATCCCTC           | PCR primer for TAV 2b cloning<br>(forward) |
| pSUMOTAV2b1r                | CCGCTCGAGTTATTGATCGAG<br>ACAC                          | PCR primer for TAV 2b cloning<br>(reverse) |
| poly(T) adapter             | GCGAGCACAGAATTAATACGA<br>CTCACTATAGGTTTTTTTTTTTT<br>VN | reverse transcription                      |
| universal reverse<br>primer | GCGAGCACAGAATTAATACGA<br>C                             | qRT-PCR                                    |
| 5.8S                        | CCTGCCTGGGCGTCAC                                       | qRT-PCR                                    |
| U6                          | GCACAAATCGAGAAATGGT                                    | qRT-PCR                                    |
| miR403                      | TTAGATTCACGCACAAACTCG                                  | qRT-PCR of miRNA                           |
| miR403*                     | CGTTTGTGCGTGATTCTGACA                                  | qRT-PCR of miRNA                           |
| miR162                      | CGATAAACCTCTGCATCCAG                                   | qRT-PCR of miRNA                           |
| miR162*                     | AGGCAGCGGTTTATCGATC                                    | qRT-PCR of miRNA                           |
| miR168                      | CTTGGTGCAGGTCGGGAA                                     | qRT-PCR of miRNA                           |
| miR168*                     | CGCCTTGCATCAACTGAAT                                    | qRT-PCR of miRNA                           |
| Dcl1f                       | TTAACTGATGTGTCAGAGTTTG<br>CAAT                         | qRT-PCR of <i>DCL1</i> mRNA                |
| Dcl1r                       | CAGTCCGAGCAATAAATAAAT<br>CCAT                          | qRT-PCR of <i>DCL1</i> mRNA                |
| Ago1f                       | TCCTCGGCCACCAGTACC                                     | qRT-PCR of <i>AGO1</i> mRNA                |
| Ago1r                       | TGGCTGAGACGAGGAACCA                                    | qRT-PCR of <i>AGO1</i> mRNA                |
| Ago2f                       | AACCTCCTTTCTATCGACCTAG<br>CA                           | qRT-PCR of <i>AGO2</i> mRNA                |
| Ago2r                       | GAATGGCAGTAAAACAAACAT<br>GAAAT                         | qRT-PCR of <i>AGO2</i> mRNA                |
| Ago1-1Hf                    | GCCATGGGGCACCTTCTG                                     | qRT-PCR of <i>AGO1-1H</i> mRNA             |
| Ago1-1Hr                    | GAGACGAGGAACCAGCCTC                                    | qRT-PCR of <i>AGO1-1H</i> mRNA             |
| Ago1-1Lf                    | ATCAACGAGGTGGAGGACAA                                   | qRT-PCR of <i>AGO1-1L</i> mRNA             |

|             |                                                |                                                                 |
|-------------|------------------------------------------------|-----------------------------------------------------------------|
| Ago1-1Lr    | GGTACTGGTGGCCGTGC                              | qRT-PCR of <i>AGO1-1L</i> mRNA                                  |
| CPHf        | CCAACGGTTCTCAGTTCTTCA                          | qRT-PCR of <i>CPH</i> mRNA                                      |
| CPHr        | CCATACAGCCTCAGCCTTCT                           | qRT-PCR of <i>CPH</i> mRNA                                      |
| CymRSVf     | AGAAATCCTCCAGGACACCTC                          | qRT-PCR of viral genomic RNA                                    |
| CymRSVr     | AATCCTCTACGCAAAGCAACAGT                        | qRT-PCR of viral genomic RNA                                    |
| T7DCL1At1f  | CCCTAATACGACTCACTATAG<br>GGTGCATTTACCGATATGC   | amplification of miR162 target for <i>in vitro</i> slicer assay |
| TraDCL1At2r | CATCCAACACGATACTCATTAA<br>CC                   | amplification of miR162 target for <i>in vitro</i> slicer assay |
| T7Ago1Nb2f  | CCTAATACGACTCACTATAGG<br>GCACCTCAGCATGGAG      | amplification of miR168 target for <i>in vitro</i> slicer assay |
| TraAgo1Nb4r | GCAGATCTTTGTCAGGTAAC<br>C                      | amplification of miR168 target for <i>in vitro</i> slicer assay |
| T7Ago2Nb1f  | CCCTAATACGACTCACTATAG<br>GATCGCAGGTACCCCATACTG | amplification of miR403 target for <i>in vitro</i> slicer assay |
| TraAgo2Nb2r | AAGAGAGAAAATACAAATCAC<br>ATTG                  | amplification of miR403 target for <i>in vitro</i> slicer assay |
