# Supplementary material for: A Viral Suppressor Modulates the Plant Immune Response Early in Infection by Regulating MicroRNA Activity
Source: PubMed Central journal article supplement (PMC5915741; doi:10.1128/mbio.00419-18), 2018-04-24
Supplement: mbo002183848st2.pdf [file mbo002183848st2.pdf]

**Table S2: RNA oligonucleotides used in this study**

| <b>oligo name</b>      | <b>nucleotide sequence</b> | <b>purpose</b>                                                                              |
|------------------------|----------------------------|---------------------------------------------------------------------------------------------|
| gf698 gs               | uaguucauccaugccaugugu      | guide strand of gf698 siRNA                                                                 |
| gf698 ps               | acauggcauggaugaacuaua      | passenger strand of gf698 siRNA                                                             |
| <i>At</i> miR162+      | ucgauaaaccucugcauccag      | guide strand of <i>At</i> miR162 (isoforms a and b) and <i>Nb</i> miR162 (isoform a)        |
| <i>At</i> miR162*      | ggaggcagcgguucaucgauc      | passenger strand of <i>At</i> miR162 (isoforms a and b) and <i>Nb</i> miR162 (isoform a)    |
| <i>Nb</i> miR162b*     | ggaggcagcgguuuaucaucgauc   | passenger strand of <i>Nb</i> miR162 (isoform b)                                            |
| <i>At</i> miR168+      | ucgcuuggugcaggucgggaa      | guide strand of <i>At</i> miR168 (isoforms a and b) and <i>Nb</i> miR168 (isoforms d and e) |
| <i>At</i> miR168a*     | cccgccuugcaucaacugaau      | passenger strand of <i>At</i> miR168 (isoform a) and <i>Nb</i> miR168 (all isoforms)        |
| <i>At</i> miR168b*     | cccgucuuguaucaacugaau      | passenger strand of <i>At</i> miR168 (isoform b)                                            |
| <i>Nb</i> miR168a,b,c+ | ucgcuuggugcaggucgggac      | guide strand of <i>Nb</i> miR168 (isoforms a,b and c)                                       |
| <i>At</i> miR403+      | uuagauucacgcacaaacucg      | guide strand of <i>At</i> miR403 and <i>Nb</i> miR403 (both isoforms)                       |
| <i>At</i> miR403*      | uguuuugugcuugaaucauu       | passenger strand of <i>At</i> miR403                                                        |
| <i>Nb</i> miR403a*     | uguuuugugcgugaauucugaca    | passenger strand of <i>Nb</i> miR403 (isoform a)                                            |
| <i>Nb</i> miR403b*     | uguuuugugcgugauucugaca     | passenger strand of <i>Nb</i> miR403 (isoform b)                                            |
